# Supplementary material for: Arctic charr brain transcriptome strongly affected by summer seasonal growth but only subtly by feed deprivation
Source: BMC Genomics. 2019 Jun 27;20:529. doi: 10.1186/s12864-019-5874-z (PMC6598377; doi:10.1186/s12864-019-5874-z)
Supplement: Supplementary file 11 — Table S9. FDP versus Fed Top annotated up-regulated contigs. LogFC = Log fold change, logCPM = log counts per million, F = F statistic, FDR = false discovery rate. (XLSX 10 kb) [file 12864_2019_5874_MOESM11_ESM.xlsx]

## Sheet: Ark1
ContigID	logFC	logCPM	F	PValue	FDR	best_hit_accession	best_hit_database	best_hit_description
Fishapp_brain_WIPI4.3.3	1.12	3.76	57.78	0	0	Q7ZUX3	swissprot	sp|Q7ZUX3|WIPI4_DANRE WD repeat domain phosphoinositide-interacting protein 4 OS=Danio rerio GN=wdr45 PE=2 SV=1
Fishapp_brain_LOC101475809	0.96	4.1	23.64	0	0.03	XP_004545679	refseq_protein	gi|498962755|ref|XP_004545679.1| PREDICTED: neuronal PAS domain-containing protein 4-like isoform X1 [Maylandia zebra]
Fishapp_brain_ddx17.2.2	0.88	4.16	55.66	0	0	XP_007231410	refseq_protein	gi|597738385|ref|XP_007231410.1| PREDICTED: probable ATP-dependent RNA helicase DDX17-like [Astyanax mexicanus]
Fishapp_brain_LOC105005941	0.88	2.68	24.86	0	0.03	XP_010862512	refseq_protein	gi|742242107|ref|XP_010862512.1| PREDICTED: proto-oncogene c-Fos-like [Esox lucius]
Fishapp_brain_LOC105013210.1.2	0.86	5.88	51.09	0	0	XP_010872873	refseq_protein	gi|742113105|ref|XP_010872873.1| PREDICTED: mitogen-activated protein kinase kinase kinase 14-like isoform X1 [Esox lucius]
Fishapp_brain_bcr.1.2	0.81	5.18	25.79	0	0.02	XP_010874564	refseq_protein	gi|742118769|ref|XP_010874564.1| PREDICTED: breakpoint cluster region protein isoform X1 [Esox lucius]
Fishapp_brain_LOC105016071	0.68	4.43	28.42	0	0.02	XP_010877951	refseq_protein	gi|742137438|ref|XP_010877951.1| PREDICTED: zinc finger protein 395-like [Esox lucius]
Fishapp_brain_LOC105017087	0.68	3.84	29	0	0.02	XP_010879726	refseq_protein	gi|742144443|ref|XP_010879726.1| PREDICTED: nuclear receptor subfamily 4 group A member 1-like isoform X1 [Esox lucius]
Fishapp_brain_txnip	0.64	4.41	35.8	0	0.01	NP_001133903	refseq_protein	gi|213513475|ref|NP_001133903.1| thioredoxin interacting protein [Salmo salar]
Fishapp_brain_LOC105027064	0.62	3.01	22.27	0	0.04	XP_010897257	refseq_protein	gi|742214066|ref|XP_010897257.1| PREDICTED: proline dehydrogenase 1, mitochondrial-like [Esox lucius]
Fishapp_brain_adck3.2.2	0.59	3.93	41.55	0	0	XP_010880917	refseq_protein	gi|742152060|ref|XP_010880917.1| PREDICTED: chaperone activity of bc1 complex-like, mitochondrial isoform X1 [Esox lucius]
Fishapp_brain_ezh1.2.2	0.58	3.36	32.99	0	0.01	XP_010872847	refseq_protein	gi|742113011|ref|XP_010872847.1| PREDICTED: histone-lysine N-methyltransferase EZH1 isoform X2 [Esox lucius]
Fishapp_brain_LOC104942424.1.2	0.58	4.23	20.98	0	0.05	XP_010765945	refseq_protein	gi|736171362|ref|XP_010765945.1| PREDICTED: nidogen-1-like [Notothenia coriiceps]
Fishapp_brain_ezh1.1.2	0.56	6.29	67.55	0	0	XP_010872846	refseq_protein	gi|742113004|ref|XP_010872846.1| PREDICTED: histone-lysine N-methyltransferase EZH1 isoform X1 [Esox lucius]
Fishapp_brain_carns1.1.3	0.55	4.06	45.66	0	0	XP_010894028	refseq_protein	gi|742202992|ref|XP_010894028.1| PREDICTED: carnosine synthase 1 [Esox lucius]
Fishapp_brain_TKTL2	0.55	3.35	30.77	0	0.02	Q9H0I9	swissprot	sp|Q9H0I9|TKTL2_HUMAN Transketolase-like protein 2 OS=Homo sapiens GN=TKTL2 PE=2 SV=1
Fishapp_brain_nat14	0.54	5.99	20.97	0	0.05	XP_010883229	refseq_protein	gi|742161522|ref|XP_010883229.1| PREDICTED: N-acetyltransferase 14 isoform X1 [Esox lucius]
Fishapp_brain_vgf.3.3	0.54	5.3	23.82	0	0.03	XP_003198998	refseq_protein	gi|326669374|ref|XP_003198998.1| PREDICTED: neurosecretory protein VGF [Danio rerio]
Fishapp_brain_LOC105011516	0.52	4.5	24.08	0	0.03	XP_010869885	refseq_protein	gi|742103177|ref|XP_010869885.1| PREDICTED: mitochondrial coenzyme A transporter SLC25A42-like [Esox lucius]
