# Supplementary material for: Arctic charr brain transcriptome strongly affected by summer seasonal growth but only subtly by feed deprivation
Source: BMC Genomics. 2019 Jun 27;20:529. doi: 10.1186/s12864-019-5874-z (PMC6598377; doi:10.1186/s12864-019-5874-z)
Supplement: Supplementary file 12 — Table S10. FDP versus Fed Top annotated down-regulated contigs. LogFC = Log fold change, logCPM = log counts per million, F = F statistic, FDR = false discovery rate. (XLSX 11 kb) [file 12864_2019_5874_MOESM12_ESM.xlsx]

## Sheet: Ark1
ContigID	logFC	logCPM	F	PValue	FDR	best_hit_accession	best_hit_database	best_hit_description
Fishapp_brain_HBA	-2.1	1.96	60.64	0	0	P11251	swissprot	sp|P11251|HBA_SALSA Hemoglobin subunit alpha OS=Salmo salar GN=hba PE=2 SV=2
Fishapp_brain_B3AT	-1.76	4.24	44.58	0	0	P32847	swissprot	sp|P32847|B3AT_ONCMY Band 3 anion exchange protein OS=Oncorhynchus mykiss GN=slc4a1 PE=2 SV=2
Fishapp_brain_LOC105028541.4.4	-1.68	0.65	33.75	0	0.01	XP_010899644	refseq_protein	gi|742225853|ref|XP_010899644.1| PREDICTED: microtubule-associated protein 1B-like isoform X1 [Esox lucius]
Fishapp_brain_HBB	-1.57	5.9	57.76	0	0	Q91473	swissprot	sp|Q91473|HBB_SALSA Hemoglobin subunit beta OS=Salmo salar GN=hbb PE=2 SV=3
Fishapp_brain_tieg3.1.2	-1.23	5.73	67.01	0	0	NP_001133301	refseq_protein	gi|213513612|ref|NP_001133301.1| Transforming growth factor-beta-inducible early growth response protein 3 [Salmo salar]
Fishapp_brain_tieg3.2.2	-1.16	4.88	58.95	0	0	NP_001133301	refseq_protein	gi|213513612|ref|NP_001133301.1| Transforming growth factor-beta-inducible early growth response protein 3 [Salmo salar]
Fishapp_brain_cdc2	-1.11	3.22	37.31	0	0.01	NP_001134623	refseq_protein	gi|213514942|ref|NP_001134623.1| cell division cycle 2 [Salmo salar]
Fishapp_brain_klf11	-1.06	3.35	43.52	0	0	XP_010877952	refseq_protein	gi|742137442|ref|XP_010877952.1| PREDICTED: Krueppel-like factor 11 [Esox lucius]
Fishapp_brain_tysy	-1.06	2.63	30.46	0	0.01	NP_001134715	refseq_protein	gi|213511040|ref|NP_001134715.1| Thymidylate synthase [Salmo salar]
Fishapp_brain_mki67	-1.05	1.09	25.72	0	0.02	XP_010892810	refseq_protein	gi|742198749|ref|XP_010892810.1| PREDICTED: antigen KI-67 isoform X2 [Esox lucius]
Fishapp_brain_LOC103037264	-0.9	6.83	24.08	0	0.03	XP_007243235	refseq_protein	gi|597806715|ref|XP_007243235.1| PREDICTED: collagen alpha-2(I) chain-like, partial [Astyanax mexicanus]
Fishapp_brain_ccna2	-0.84	2.97	47.17	0	0	NP_001133671	refseq_protein	gi|213512634|ref|NP_001133671.1| cyclin-A2 [Salmo salar]
Fishapp_brain_CP1A1	-0.84	4.16	25.49	0	0.02	Q92110	swissprot	sp|Q92110|CP1A1_ONCMY Cytochrome P450 1A1 OS=Oncorhynchus mykiss GN=cyp1a1 PE=2 SV=2
Fishapp_brain_TUBB4B	-0.84	1.72	30.2	0	0.01	XP_010719419	refseq_protein	gi|733914139|ref|XP_010719419.1| PREDICTED: tubulin beta-4B chain [Meleagris gallopavo]
Fishapp_brain_top2a	-0.82	4.4	63.15	0	0	XP_010892820	refseq_protein	gi|742198788|ref|XP_010892820.1| PREDICTED: DNA topoisomerase 2-alpha [Esox lucius]
Fishapp_brain_nusap1	-0.73	2.85	32.8	0	0.01	XP_010877716	refseq_protein	gi|742136405|ref|XP_010877716.1| PREDICTED: nucleolar and spindle-associated protein 1 isoform X1 [Esox lucius]
Fishapp_brain_LOC105021720	-0.63	7.68	25.65	0	0.02	XP_010887874	refseq_protein	gi|742180033|ref|XP_010887874.1| PREDICTED: hydroxymethylglutaryl-CoA synthase, cytoplasmic-like isoform X1 [Esox lucius]
Fishapp_brain_TBB5	-0.63	4.07	37.43	0	0.01	Q6GLE7	swissprot	sp|Q6GLE7|TBB5_XENTR Tubulin beta chain OS=Xenopus tropicalis GN=tubb PE=2 SV=1
Fishapp_brain_cdk2	-0.62	2.81	26.81	0	0.03	NP_001135206	refseq_protein	gi|213513762|ref|NP_001135206.1| cell division protein kinase 2 [Salmo salar]
Fishapp_brain_rir2	-0.61	4.35	28.37	0	0.02	NP_001133495	refseq_protein	gi|213511642|ref|NP_001133495.1| Ribonucleoside-diphosphate reductase subunit M2 [Salmo salar]
Fishapp_brain_prep.1.2	-0.59	2.99	36.44	0	0.03	XP_010887799	refseq_protein	gi|742179750|ref|XP_010887799.1| PREDICTED: prolyl endopeptidase isoform X2 [Esox lucius]
Fishapp_brain_lss	-0.58	4.14	23.3	0	0.03	XP_010878119	refseq_protein	gi|742138213|ref|XP_010878119.1| PREDICTED: lanosterol synthase isoform X1 [Esox lucius]
Fishapp_brain_mcm5	-0.58	3.44	32.69	0	0.01	NP_001133293	refseq_protein	gi|213512090|ref|NP_001133293.1| DNA replication licensing factor MCM5 [Salmo salar]
Fishapp_brain_mcm6	-0.58	3.83	36.35	0	0.01	XP_010887193	refseq_protein	gi|742088704|ref|XP_010887193.1| PREDICTED: DNA replication licensing factor MCM6 [Esox lucius]
Fishapp_brain_lmnb1	-0.57	4.85	43.51	0	0	XP_010887939	refseq_protein	gi|742180291|ref|XP_010887939.1| PREDICTED: lamin-B1 [Esox lucius] >gi|742180297|ref|XP_010887940.1| PREDICTED: lamin-B1 [Esox lucius]
Fishapp_brain_mthfd2	-0.56	4.1	36.75	0	0.01	XP_010895662	refseq_protein	gi|742208538|ref|XP_010895662.1| PREDICTED: bifunctional methylenetetrahydrofolate dehydrogenase/cyclohydrolase, mitochondrial [Esox lucius]
Fishapp_brain_TBB1	-0.56	3.52	33.59	0	0.01	Q9YHC3	swissprot	sp|Q9YHC3|TBB1_GADMO Tubulin beta-1 chain OS=Gadus morhua PE=2 SV=1
Fishapp_brain_g3bp2.2.3	-0.53	3.71	25.04	0	0.03	NP_001135275	refseq_protein	gi|213510806|ref|NP_001135275.1| ras GTPase-activating protein-binding protein 2 [Salmo salar]
Fishapp_brain_mcm4	-0.53	3.3	26.11	0	0.03	NP_001167212	refseq_protein	gi|291190228|ref|NP_001167212.1| DNA replication licensing factor MCM4 [Salmo salar]
Fishapp_brain_nsdhl	-0.52	3.79	23.53	0	0.03	XP_010895002	refseq_protein	gi|742091351|ref|XP_010895002.1| PREDICTED: sterol-4-alpha-carboxylate 3-dehydrogenase, decarboxylating isoform X2 [Esox lucius]
Fishapp_brain_mcm2	-0.51	3.97	32.76	0	0.01	NP_001167097	refseq_protein	gi|291190282|ref|NP_001167097.1| DNA replication licensing factor MCM2 [Salmo salar]
