# Supplementary material for: Arctic charr brain transcriptome strongly affected by summer seasonal growth but only subtly by feed deprivation
Source: BMC Genomics. 2019 Jun 27;20:529. doi: 10.1186/s12864-019-5874-z (PMC6598377; doi:10.1186/s12864-019-5874-z)
Supplement: Supplementary file 13 — Table S11. T1_Fed versus T0 Top annotated up-regulated contigs. LogFC = Log fold change, logCPM = log counts per million, F = F statistic, FDR = false discovery rate. (XLSX 13 kb) [file 12864_2019_5874_MOESM13_ESM.xlsx]

## Sheet: Ark1
ContigID	logFC	logCPM	F	PValue	FDR	best_hit_accession	best_hit_database	best_hit_description
Fishapp_brain_LOC102194111	2.35	4.36	77.45	0	0	XP_005752764	refseq_protein	gi|548538847|ref|XP_005752764.1| PREDICTED: uncharacterized protein LOC102194111 [Pundamilia nyererei]
Fishapp_brain_hsp47	1.98	3.97	58.37	0	0	NP_001117706	refseq_protein	gi|185132265|ref|NP_001117706.1| heat shock protein 47 precursor [Oncorhynchus mykiss]
Fishapp_brain_nattl	1.93	2.34	20.02	0	0.01	NP_001134309	refseq_protein	gi|213515472|ref|NP_001134309.1| Natterin-like protein [Salmo salar]
Fishapp_brain_LOC105026715.1.2	1.87	0.94	11.64	0	0.04	XP_010896655	refseq_protein	gi|742211959|ref|XP_010896655.1| PREDICTED: EH domain-containing protein 1-like isoform X2 [Esox lucius]
Fishapp_brain_IscW_ISCW010708	1.86	1.89	68.86	0	0	XP_002404304	refseq_protein	gi|241723783|ref|XP_002404304.1| regulator of nonsense transcripts 3B, putative [Ixodes scapularis]
Fishapp_brain_p2rx4	1.81	1.22	81.71	0	0	XP_010874667	refseq_protein	gi|742119104|ref|XP_010874667.1| PREDICTED: P2X purinoceptor 4 [Esox lucius]
Fishapp_brain_LOC105027984.1.3	1.78	0.2	23.78	0	0	XP_010898691	refseq_protein	gi|742219104|ref|XP_010898691.1| PREDICTED: sentrin-specific protease 7-like isoform X2 [Esox lucius]
Fishapp_brain_lepb1	1.7	3.07	58.2	0	0	NP_001266063	refseq_protein	gi|525313458|ref|NP_001266063.1| leptin B1 precursor [Salmo salar]
Fishapp_brain_JARD2	1.67	3.74	217.72	0	0	Q1LVC2	swissprot	sp|Q1LVC2|JARD2_DANRE Protein Jumonji OS=Danio rerio GN=jarid2b PE=3 SV=2
Fishapp_brain_LOC105012776.1.2	1.67	4.5	708.4	0	0	XP_010872151	refseq_protein	gi|742110468|ref|XP_010872151.1| PREDICTED: homocysteine-responsive endoplasmic reticulum-resident ubiquitin-like domain member 2 protein [Esox lucius]
Fishapp_brain_LOC105028541.4.4	1.6	0.65	31.26	0	0	XP_010899644	refseq_protein	gi|742225853|ref|XP_010899644.1| PREDICTED: microtubule-associated protein 1B-like isoform X1 [Esox lucius]
Fishapp_brain_ddhd1.2.5	1.5	2	89.09	0	0	XP_010880583	refseq_protein	gi|742150714|ref|XP_010880583.1| PREDICTED: phospholipase DDHD1 [Esox lucius] >gi|742150720|ref|XP_010880584.1| PREDICTED: phospholipase DDHD1 [Esox lucius]
Fishapp_brain_DJC27	1.48	-0.17	31.58	0	0	Q6IMK3	swissprot	sp|Q6IMK3|DJC27_DANRE DnaJ homolog subfamily C member 27 OS=Danio rerio GN=dnajc27 PE=2 SV=1
Fishapp_brain_tax1bp1.1.4	1.48	1.5	42.6	0	0	XP_010891323	refseq_protein	gi|742193592|ref|XP_010891323.1| PREDICTED: tax1-binding protein 1 isoform X2 [Esox lucius]
Fishapp_brain_LOC105007533	1.45	4.41	19.01	0	0.01	XP_010864802	refseq_protein	gi|742246369|ref|XP_010864802.1| PREDICTED: probable pancreatic secretory proteinase inhibitor isoform X1 [Esox lucius]
Fishapp_brain_ef2.2.3	1.44	7.34	462.66	0	0	NP_001133466	refseq_protein	gi|213511398|ref|NP_001133466.1| Elongation factor 2 [Salmo salar]
Fishapp_brain_LOC102310373	1.39	-0.25	37.12	0	0	XP_005933636	refseq_protein	gi|554846628|ref|XP_005933636.1| PREDICTED: leucine-rich repeat-containing protein 16B-like [Haplochromis burtoni]
Fishapp_brain_LOC105015765	1.38	-1.05	14.52	0	0.02	XP_010877449	refseq_protein	gi|742135339|ref|XP_010877449.1| PREDICTED: collagen alpha-1(XII) chain-like isoform X1 [Esox lucius]
Fishapp_brain_LOC105010020	1.34	5.22	59.97	0	0	XP_010867713	refseq_protein	gi|742251821|ref|XP_010867713.1| PREDICTED: inter-alpha-trypsin inhibitor heavy chain H3-like [Esox lucius]
Fishapp_brain_5ntc	1.33	3.48	97.85	0	0	NP_001133412	refseq_protein	gi|213512100|ref|NP_001133412.1| Cytosolic purine 5-nucleotidase [Salmo salar]
Fishapp_brain_LOC101475809	1.33	4.1	39.75	0	0	XP_004545679	refseq_protein	gi|498962755|ref|XP_004545679.1| PREDICTED: neuronal PAS domain-containing protein 4-like isoform X1 [Maylandia zebra]
Fishapp_brain_hps3.1.2	1.31	4.35	49.73	0	0	XP_010865403	refseq_protein	gi|742247468|ref|XP_010865403.1| PREDICTED: Hermansky-Pudlak syndrome 3 protein [Esox lucius]
Fishapp_brain_ninj2	1.29	5.09	17	0	0.01	XP_010893480	refseq_protein	gi|742201055|ref|XP_010893480.1| PREDICTED: ninjurin-2 isoform X1 [Esox lucius]
Fishapp_brain_WDR37	1.28	0.21	26.11	0	0	Q6DDF0	swissprot	sp|Q6DDF0|WDR37_XENLA WD repeat-containing protein 37 OS=Xenopus laevis GN=wdr37 PE=2 SV=1
Fishapp_brain_LOC105005941	1.26	2.68	41.97	0	0	XP_010862512	refseq_protein	gi|742242107|ref|XP_010862512.1| PREDICTED: proto-oncogene c-Fos-like [Esox lucius]
Fishapp_brain_LOC102222545	1.25	1.13	17.24	0	0.01	XP_005810222	refseq_protein	gi|551517443|ref|XP_005810222.1| PREDICTED: uncharacterized protein LOC102222545 [Xiphophorus maculatus]
Fishapp_brain_LOC101067200	1.23	-0.2	13.75	0	0.02	XP_011616361	refseq_protein	gi|768955422|ref|XP_011616361.1| PREDICTED: protein yippee-like 2 [Takifugu rubripes]
Fishapp_brain_upp.2.2	1.22	1.78	26.59	0	0	NP_001133478	refseq_protein	gi|213513534|ref|NP_001133478.1| Uracil phosphoribosyltransferase [Salmo salar]
Fishapp_brain_bpi	1.21	2.76	56.1	0	0	NP_001135199	refseq_protein	gi|213512576|ref|NP_001135199.1| Bactericidal permeability-increasing protein precursor [Salmo salar]
Fishapp_brain_fam135b	1.21	1.19	50.97	0	0	XP_010871888	refseq_protein	gi|742109567|ref|XP_010871888.1| PREDICTED: protein FAM135B isoform X2 [Esox lucius]
Fishapp_brain_LOC105028591.1.2	1.21	0.22	17.17	0	0.01	XP_010899744	refseq_protein	gi|742226201|ref|XP_010899744.1| PREDICTED: flotillin-1 [Esox lucius]
Fishapp_brain_LOC103035992	1.2	2.93	63.04	0	0	XP_007235955	refseq_protein	gi|597747963|ref|XP_007235955.1| PREDICTED: vegetative incompatibility protein HET-E-1-like [Astyanax mexicanus]
Fishapp_brain_HBB	1.19	5.9	34.02	0	0	Q91473	swissprot	sp|Q91473|HBB_SALSA Hemoglobin subunit beta OS=Salmo salar GN=hbb PE=2 SV=3
Fishapp_brain_TBA1D.1.2	1.19	5.43	457.2	0	0	Q2HJ86	swissprot	sp|Q2HJ86|TBA1D_BOVIN Tubulin alpha-1D chain OS=Bos taurus GN=TUBA1D PE=1 SV=1
Fishapp_brain_anxa3	1.17	3.76	140.34	0	0	NP_001134415	refseq_protein	gi|213513512|ref|NP_001134415.1| Annexin A3 [Salmo salar]
Fishapp_brain_dnaja4	1.15	3.37	57.2	0	0	XP_010867244	refseq_protein	gi|742250922|ref|XP_010867244.1| PREDICTED: dnaJ homolog subfamily A member 4 [Esox lucius]
Fishapp_brain_LOC105006249	1.15	2.96	28.62	0	0	XP_010862991	refseq_protein	gi|742242990|ref|XP_010862991.1| PREDICTED: early growth response protein 1-B-like [Esox lucius]
Fishapp_brain_agpat4	1.13	4.02	33.99	0	0	XP_010865629	refseq_protein	gi|742096083|ref|XP_010865629.1| PREDICTED: 1-acyl-sn-glycerol-3-phosphate acyltransferase delta [Esox lucius] >gi|742096087|ref|XP_010865637.1| PREDICTED: 1-acyl-sn-glycerol-3-phosphate acyltransferase delta [Esox lucius]
Fishapp_brain_LOC105028005	1.13	1.42	40.39	0	0	XP_010898730	refseq_protein	gi|742219251|ref|XP_010898730.1| PREDICTED: calpain-1 catalytic subunit-like [Esox lucius]
Fishapp_brain_nup155.4.5	1.12	0.27	31.74	0	0	XP_010893987	refseq_protein	gi|742202861|ref|XP_010893987.1| PREDICTED: nuclear pore complex protein Nup155 isoform X1 [Esox lucius]
Fishapp_brain_sag	1.12	2.23	28.59	0	0	XP_010901659	refseq_protein	gi|742232945|ref|XP_010901659.1| PREDICTED: S-arrestin [Esox lucius]
Fishapp_brain_LOC105022989.2.2	1.1	1.59	37.15	0	0	XP_010890123	refseq_protein	gi|742089770|ref|XP_010890123.1| PREDICTED: serine/threonine-protein kinase OSR1-like [Esox lucius]
Fishapp_brain_UBP13	1.1	2.37	47.4	0	0	F1QFS9	swissprot	sp|F1QFS9|UBP13_DANRE Ubiquitin carboxyl-terminal hydrolase 13 OS=Danio rerio GN=usp13 PE=2 SV=1
Fishapp_brain_CNEPA	1.09	0.48	14.17	0	0.02	Q5U395	swissprot	sp|Q5U395|CNEPA_DANRE CTD nuclear envelope phosphatase 1A OS=Danio rerio GN=ctdnep1a PE=2 SV=1
Fishapp_brain_LOC105011288.2.2	1.09	3.73	51.87	0	0	XP_010869508	refseq_protein	gi|742101838|ref|XP_010869508.1| PREDICTED: early growth response protein 1-like [Esox lucius]
Fishapp_brain_man2a2.3.3	1.09	2.84	14.03	0	0.02	XP_008410088	refseq_protein	gi|658854925|ref|XP_008410088.1| PREDICTED: alpha-mannosidase 2x [Poecilia reticulata]
Fishapp_brain_ST7.1.3	1.09	0.05	11.75	0	0.04	A0M8U1	swissprot	sp|A0M8U1|ST7_CHICK Suppressor of tumorigenicity 7 protein homolog OS=Gallus gallus GN=ST7 PE=3 SV=1
Fishapp_brain_LOC105029373	1.08	2.92	70.03	0	0	XP_010900996	refseq_protein	gi|742230613|ref|XP_010900996.1| PREDICTED: uncharacterized protein C15orf26 homolog isoform X1 [Esox lucius]
Fishapp_brain_LOC101493977	1.07	1.88	41.28	0	0	XP_004505847	refseq_protein	gi|502145032|ref|XP_004505847.1| PREDICTED: protein ALWAYS EARLY 2-like [Cicer arietinum]
