# Supplementary material for: Arctic charr brain transcriptome strongly affected by summer seasonal growth but only subtly by feed deprivation
Source: BMC Genomics. 2019 Jun 27;20:529. doi: 10.1186/s12864-019-5874-z (PMC6598377; doi:10.1186/s12864-019-5874-z)
Supplement: Supplementary file 14 — Table S12. T1_Fed versus T0 Top annotated down-regulated contigs. LogFC = Log fold change, logCPM = log counts per million, F = F statistic, FDR = false discovery rate. (XLSX 12 kb) [file 12864_2019_5874_MOESM14_ESM.xlsx]

## Sheet: Ark1
ContigID	logFC	logCPM	F	PValue	FDR	best_hit_accession	best_hit_database	best_hit_description
Fishapp_brain_jarid2.1.2	-3.57	4.22	720.52	0	0	XP_010872124	refseq_protein	gi|742110401|ref|XP_010872124.1| PREDICTED: protein Jumonji, partial [Esox lucius]
Fishapp_brain_jarid2.2.2	-3.04	6.19	1369.02	0	0	XP_010872124	refseq_protein	gi|742110401|ref|XP_010872124.1| PREDICTED: protein Jumonji, partial [Esox lucius]
Fishapp_brain_JARID2	-2.85	1.79	223.8	0	0	XP_010944087	refseq_protein	gi|743701813|ref|XP_010944087.1| PREDICTED: protein Jumonji [Camelus bactrianus]
Fishapp_brain_TBAT	-1.93	3.28	365.32	0	0	P18288	swissprot	sp|P18288|TBAT_ONCMY Tubulin alpha chain, testis-specific OS=Oncorhynchus mykiss PE=2 SV=1
Fishapp_brain_LOC102112523	-1.8	0.65	26.13	0	0	XP_005534326	refseq_protein	gi|543382272|ref|XP_005534326.1| PREDICTED: uncharacterized protein LOC102112523 [Pseudopodoces humilis]
Fishapp_brain_ppp1r17.1.2	-1.66	0.86	29.49	0	0	XP_010897322	refseq_protein	gi|742214296|ref|XP_010897322.1| PREDICTED: protein phosphatase 1 regulatory subunit 17 [Esox lucius]
Fishapp_brain_pggt1b.2.2	-1.47	3.35	12.27	0	0.03	XP_010875375	refseq_protein	gi|742122910|ref|XP_010875375.1| PREDICTED: geranylgeranyl transferase type-1 subunit beta [Esox lucius]
Fishapp_brain_suz12.2.2	-1.38	5.63	500.1	0	0	XP_010871257	refseq_protein	gi|742107546|ref|XP_010871257.1| PREDICTED: polycomb protein SUZ12 isoform X1 [Esox lucius] >gi|742107550|ref|XP_010871258.1| PREDICTED: polycomb protein SUZ12 isoform X1 [Esox lucius]
Fishapp_brain_LOC105025099.2.3	-1.36	0.68	22.74	0	0	XP_010893858	refseq_protein	gi|742202413|ref|XP_010893858.1| PREDICTED: transmembrane protein 184B-like isoform X2 [Esox lucius]
Fishapp_brain_LOC105015657	-1.35	3.67	38.86	0	0	XP_010877266	refseq_protein	gi|742085336|ref|XP_010877266.1| PREDICTED: trans-1,2-dihydrobenzene-1,2-diol dehydrogenase-like isoform X1 [Esox lucius]
Fishapp_brain_contig_16122	-1.33	-0.16	10.45	0	0.05	CB499522.1|CB499522	NCBI_est	gi|29310748|gb|CB499522.1|CB499522 ssalkhc013093 kidney Salmo salar cDNA, mRNA sequence
Fishapp_brain_LOC105024451.2.2	-1.33	0.9	14.44	0	0.02	XP_010892706	refseq_protein	gi|742198361|ref|XP_010892706.1| PREDICTED: sorting nexin-27-like isoform X1 [Esox lucius]
Fishapp_brain_p4r2a.2.3	-1.27	3.26	201.07	0	0	NP_001158823	refseq_protein	gi|259155162|ref|NP_001158823.1| Serine/threonine-protein phosphatase 4 regulatory subunit 2-A [Salmo salar]
Fishapp_brain_sec23ip.2.2	-1.25	0.72	47.78	0	0	XP_010899821	refseq_protein	gi|742226476|ref|XP_010899821.1| PREDICTED: SEC23-interacting protein isoform X1 [Esox lucius]
Fishapp_brain_LOC103044328	-1.21	5.57	445.66	0	0	XP_007252015	refseq_protein	gi|597776674|ref|XP_007252015.1| PREDICTED: tubby-related protein 4-like isoform X1 [Astyanax mexicanus] >gi|597776676|ref|XP_007252016.1| PREDICTED: tubby-related protein 4-like isoform X2 [Astyanax mexicanus]
Fishapp_brain_LOC105006814.2.2	-1.2	3.43	80.64	0	0	XP_010863812	refseq_protein	gi|742244526|ref|XP_010863812.1| PREDICTED: uncharacterized protein LOC105006814 [Esox lucius] >gi|742244528|ref|XP_010863813.1| PREDICTED: uncharacterized protein LOC105006814 [Esox lucius]
Fishapp_brain_LOC105006814.1.2	-1.16	3.6	80.94	0	0	XP_010863812	refseq_protein	gi|742244526|ref|XP_010863812.1| PREDICTED: uncharacterized protein LOC105006814 [Esox lucius] >gi|742244528|ref|XP_010863813.1| PREDICTED: uncharacterized protein LOC105006814 [Esox lucius]
Fishapp_brain_LOC105028880.2.3	-1.16	2.53	74.07	0	0	XP_010900229	refseq_protein	gi|742093185|ref|XP_010900229.1| PREDICTED: E3 ubiquitin-protein ligase RNF38-like [Esox lucius]
Fishapp_brain_csmd1.1.3	-1.15	0.13	19.26	0	0.01	XP_010887352	refseq_protein	gi|742178039|ref|XP_010887352.1| PREDICTED: CUB and sushi domain-containing protein 1 [Esox lucius]
Fishapp_brain_suz12.1.2	-1.15	4.84	270.75	0	0	XP_010871257	refseq_protein	gi|742107546|ref|XP_010871257.1| PREDICTED: polycomb protein SUZ12 isoform X1 [Esox lucius] >gi|742107550|ref|XP_010871258.1| PREDICTED: polycomb protein SUZ12 isoform X1 [Esox lucius]
Fishapp_brain_env.2.8	-1.14	4.25	33.39	0	0	YP_443923	refseq_protein	gi|83722646|ref|YP_443923.1| envelope protein [Atlantic salmon swim bladder sarcoma virus]
Fishapp_brain_slc13a5	-1.13	4.2	143.78	0	0	XP_010890431	refseq_protein	gi|742081430|ref|XP_010890431.1| PREDICTED: solute carrier family 13 member 5 [Esox lucius]
Fishapp_brain_LOC105015451.2.2	-1.11	5.74	351.54	0	0	XP_010876935	refseq_protein	gi|742133312|ref|XP_010876935.1| PREDICTED: tubby-related protein 4-like [Esox lucius]
Fishapp_brain_LOC105028964.4.4	-1.09	0.19	18.61	0	0.01	XP_010900336	refseq_protein	gi|742228275|ref|XP_010900336.1| PREDICTED: rho guanine nucleotide exchange factor 9-like isoform X2 [Esox lucius]
Fishapp_brain_iqcb1	-1.08	1.56	29.81	0	0	XP_010884419	refseq_protein	gi|742166142|ref|XP_010884419.1| PREDICTED: IQ calmodulin-binding motif-containing protein 1 isoform X1 [Esox lucius]
Fishapp_brain_kiaa0100.6.12	-1.08	2.08	35.53	0	0	XP_010863617	refseq_protein	gi|742244163|ref|XP_010863617.1| PREDICTED: UPF0378 protein KIAA0100 homolog isoform X2 [Esox lucius]
Fishapp_brain_pon2.2.3	-1.08	1.87	30.23	0	0	NP_001134978	refseq_protein	gi|213512178|ref|NP_001134978.1| serum paraoxonase/arylesterase 2 precursor [Salmo salar]
Fishapp_brain_EML6	-1.07	5.66	135.4	0	0	XP_007968806	refseq_protein	gi|635080696|ref|XP_007968806.1| PREDICTED: echinoderm microtubule-associated protein-like 6 isoform X7 [Chlorocebus sabaeus]
Fishapp_brain_LOC105028880.1.3	-1.07	2.58	90.49	0	0	XP_010900229	refseq_protein	gi|742093185|ref|XP_010900229.1| PREDICTED: E3 ubiquitin-protein ligase RNF38-like [Esox lucius]
Fishapp_brain_SLC47A1	-1.07	1.45	31.25	0	0	XP_004405233	refseq_protein	gi|472371469|ref|XP_004405233.1| PREDICTED: multidrug and toxin extrusion protein 1 [Odobenus rosmarus divergens]
Fishapp_brain_shank3.1.2	-1.06	0.6	16.61	0	0.01	XP_010888691	refseq_protein	gi|742183673|ref|XP_010888691.1| PREDICTED: SH3 and multiple ankyrin repeat domains protein 3 [Esox lucius]
Fishapp_brain_kiaa0100.7.12	-1.04	2.23	35.41	0	0	XP_010863619	refseq_protein	gi|742244165|ref|XP_010863619.1| PREDICTED: UPF0378 protein KIAA0100 homolog isoform X3 [Esox lucius]
Fishapp_brain_stambp	-1.03	2.54	48.48	0	0	XP_010863398	refseq_protein	gi|742243742|ref|XP_010863398.1| PREDICTED: STAM-binding protein [Esox lucius] >gi|742243744|ref|XP_010863399.1| PREDICTED: STAM-binding protein [Esox lucius]
Fishapp_brain_CREB1	-1.01	2.38	46.37	0	0	P27925	swissprot	sp|P27925|CREB1_BOVIN Cyclic AMP-responsive element-binding protein 1 OS=Bos taurus GN=CREB1 PE=1 SV=2
Fishapp_brain_dennd5a.2.3	-1	-0.46	11.5	0	0.04	XP_010876556	refseq_protein	gi|742085104|ref|XP_010876556.1| PREDICTED: DENN domain-containing protein 5A isoform X2 [Esox lucius]
Fishapp_brain_p4r2a.3.3	-1	2.29	38.07	0	0	NP_001158823	refseq_protein	gi|259155162|ref|NP_001158823.1| Serine/threonine-protein phosphatase 4 regulatory subunit 2-A [Salmo salar]
Fishapp_brain_phf20l1.1.2	-0.99	5.01	217.88	0	0	XP_010878759	refseq_protein	gi|742140776|ref|XP_010878759.1| PREDICTED: PHD finger protein 20-like protein 1 isoform X3 [Esox lucius]
Fishapp_brain_tbcel.4.4	-0.99	0.13	10.97	0	0.04	XP_010868600	refseq_protein	gi|742098838|ref|XP_010868600.1| PREDICTED: tubulin-specific chaperone cofactor E-like protein isoform X1 [Esox lucius] >gi|742098842|ref|XP_010868601.1| PREDICTED: tubulin-specific chaperone cofactor E-like protein isoform X1 [Esox lucius] >gi|742098846|ref|XP_010868602.1| PREDICTED: tubulin-specific chaperone cofactor E-like protein isoform X1 [Esox lucius] >gi|742098850|ref|XP_010868603.1| PRE…
Fishapp_brain_LOC104531997	-0.98	1.16	19.5	0	0.01	XP_010175372	refseq_protein	gi|704287717|ref|XP_010175372.1| PREDICTED: nucleolysin TIA-1-like, partial [Caprimulgus carolinensis]
Fishapp_brain_LOC104927480.1.2	-0.98	2.37	49.16	0	0	XP_010739872	refseq_protein	gi|734623721|ref|XP_010739872.1| PREDICTED: calcium-binding mitochondrial carrier protein SCaMC-1-A-like [Larimichthys crocea]
Fishapp_brain_mybl1	-0.98	3.84	52.56	0	0	XP_010884218	refseq_protein	gi|742165386|ref|XP_010884218.1| PREDICTED: myb-related protein A [Esox lucius]
Fishapp_brain_prkd1.2.7	-0.92	0.68	18.07	0	0.01	XP_010891227	refseq_protein	gi|742193247|ref|XP_010891227.1| PREDICTED: serine/threonine-protein kinase D1 [Esox lucius]
Fishapp_brain_crfa.2.2	-0.91	1.42	17.55	0	0.01	NP_001117113	refseq_protein	gi|185132165|ref|NP_001117113.1| C-RFamide peptide [Salmo salar]
Fishapp_brain_LOC104934062	-0.91	5.28	151.53	0	0	XP_010747937	refseq_protein	gi|734638402|ref|XP_010747937.1| PREDICTED: tubby-related protein 4-like [Larimichthys crocea]
Fishapp_brain_ppp1r17.2.2	-0.91	1.24	20.73	0	0.01	XP_010897322	refseq_protein	gi|742214296|ref|XP_010897322.1| PREDICTED: protein phosphatase 1 regulatory subunit 17 [Esox lucius]
Fishapp_brain_ARNT.1.2	-0.9	2.65	30.15	0	0	P79832	swissprot	sp|P79832|ARNT_ONCMY Aryl hydrocarbon receptor nuclear translocator OS=Oncorhynchus mykiss GN=arnt PE=1 SV=1
Fishapp_brain_kcnq2.2.3	-0.9	1.52	28	0	0	XP_010874084	refseq_protein	gi|742117194|ref|XP_010874084.1| PREDICTED: potassium voltage-gated channel subfamily KQT member 2 isoform X2 [Esox lucius]
Fishapp_brain_LOC105013965.2.2	-0.9	2.6	21.15	0	0.01	XP_010874168	refseq_protein	gi|742117478|ref|XP_010874168.1| PREDICTED: DNA topoisomerase 1-like [Esox lucius]
Fishapp_brain_sgk1.1.2	-0.9	1.58	28.53	0	0	XP_010881383	refseq_protein	gi|742153993|ref|XP_010881383.1| PREDICTED: serine/threonine-protein kinase Sgk1 isoform X3 [Esox lucius]
